# Supplementary material for: Synthesis of cross-linked poly(acrylic acid) nanogels in an aqueous environment using precipitation polymerization: unusually high volume change
Source: R Soc Open Sci. 2019 Nov 6;6(11):190981. doi: 10.1098/rsos.190981 (PMC6894567; doi:10.1098/rsos.190981)
Supplement: Raw data for Fig. 2A [file rsos190981supp1.xlsx]

## Sheet: Arkusz1
pH	Hydrodynamic diameter / nm			standard deviation			Raw data from Zetasizer for pH 3.6								Raw data from Zetasizer for pH 10.7
1.9	122			76
3.6	162			76
4.7	829			141
6	1580			162
7.4	1972			209
8.4	1990			204
