# Supplementary material for: Synthesis of cross-linked poly(acrylic acid) nanogels in an aqueous environment using precipitation polymerization: unusually high volume change
Source: R Soc Open Sci. 2019 Nov 6;6(11):190981. doi: 10.1098/rsos.190981 (PMC6894567; doi:10.1098/rsos.190981)
Supplement: Raw data for Fig. 2B [file rsos190981supp2.xlsx]

## Sheet: Arkusz1
for pH 1.9	size / nm	intensity / %		for pH 8.4		0.4	0
	0.4	0				0.4632	0		Histograms:
	0.4632	0				0.5365	0
	0.5365	0				0.6213	0
	0.6213	0				0.7195	0
	0.7195	0				0.8332	0
	0.8332	0				0.9649	0
	0.9649	0				1.117	0
	1.117	0				1.294	0
	1.294	0				1.499	0
	1.499	0				1.736	0
	1.736	0				2.01	0
	2.01	0				2.328	0
	2.328	0				2.696	0
	2.696	0				3.122	0
	3.122	0				3.615	0
	3.615	0				4.187	0
	4.187	0				4.849	0
	4.849	0				5.615	0
	5.615	0				6.503	0
	6.503	0				7.531	0
	7.531	0				8.721	0
	8.721	0				10.1	0
	10.1	0				11.7	0
	11.7	0				13.54	0
	13.54	0				15.69	0
	15.69	0				18.17	0
	18.17	0				21.04	0
	21.04	0				24.36	0
	24.36	0				28.21	0
	28.21	0				32.67	0
	32.67	0				37.84	0
	37.84	0				43.82	0
	43.82	0				50.75	0
	50.75	0				58.77	0
	58.77	0				68.06	0
	68.06	0				78.82	0
	78.82	0.2				91.28	0
	91.28	3.3				105.7	0
	105.7	7.7				122.4	0
	122.4	11.5				141.8	0
	141.8	12.8				164.2	0
	164.2	11				190.1	0
	190.1	6.9				220.2	0
	220.2	2.6				255	0
	255	0				295.3	0
	295.3	0				342	0
	342	0				396.1	0
	396.1	0				458.7	0
	458.7	0				531.2	0
	531.2	0				615.1	0
	615.1	0				712.4	0
	712.4	0				825	0.9
	825	0				955.4	2.9
	955.4	0				1106	5.8
	1106	0				1281	8.8
	1281	0				1484	11.4
	1484	0				1718	13
	1718	0				1990	13.5
	1990	0				2305	12.8
	2305	0				2669	11
	2669	0				3091	8.6
	3091	0				3580	5.9
	3580	0				4145	3.5
	4145	0				4801	1.6
	4801	0				5560	0.4
	5560	0				6439	0
	6439	0				7456	0
	7456	0				8635	0
	8635	0				10000	0
	10000	0
