# Supplementary material for: Synthesis of cross-linked poly(acrylic acid) nanogels in an aqueous environment using precipitation polymerization: unusually high volume change
Source: R Soc Open Sci. 2019 Nov 6;6(11):190981. doi: 10.1098/rsos.190981 (PMC6894567; doi:10.1098/rsos.190981)
Supplement: Raw data for Fig. 3 [file rsos190981supp3.xlsx]

## Sheet: Arkusz1
pH	Zeta potential / mV		standard deviation				Raw data from Zeta sizer for pH 1.9									Raw data from Zeta sizer for pH 8.4
1.9	1.22		3.68
2.5	-0.97		4.16
3.6	-5.31		5.89
3.8	-6.33		6.51
4.1	-10.2		3.76
4.7	-22.2		5.38
5.5	-47.6		4.19
6	-64		9.36
6.7	-97		6.73
7.4	-116		4.12
7.9	-128		4.56
8.4	-127		4.02
10.4	-125		6.37
